# Supplementary material for: Exploration of the uptake of asymptomatic COVID-19 lateral flow testing in Birmingham, UK: survey and qualitative research
Source: HighWire-hosted journal article supplement (doi:10.1136/bmjopen-2021-056606), 2022-04-01
Supplement: bmjopen-2021-056606supp002_data_supplement.pdf [file bmjopen-2021-056606supp002_data_supplement.pdf]

## SUPPLEMENTARY APPENDIX 2: INTERVIEW SCHEDULE

### ***Prior to interview***

*Note the reason for speaking to this interviewee based on the sampling criteria grid and identify which sections are relevant to this interviewee.*

*Review responses to survey prior to interview inc. free text. to help with the above. Note these down in the relevant sections in preparation to help with interview conduct / management. e.g. the reasons they have indicated in the survey that they refused testing. These will be used in opening questions in each section i.e. checking back / reminding interviewee of survey responses.*

### *Introduction and opening remarks*

- 1.) Introduce self and tell participant you will begin recording- specify recording will be done using a Dictaphone, rather than through third party software i.e. Zoom/Skype.
- 2.) Achieve informed consent verbally, take participant through information sheet and consent form, ensuring participant is aware of the broad aims of the study, and their rights as research participants. Check off consent statements during verbal consent.
- 3.) Ensure the participant is comfortable to begin the interview and give them the opportunity to ask any questions before beginning.
- 4.) Briefly orientate participant to topics you would like to discuss – follow up regarding responses to lateral flow test survey (will be participant specific).

### *Start of interview;*

*Briefly check – interviewee's circumstances and which lateral flow test offers are relevant to them e.g. may have indicated they do or don't have children, are not eligible for workplace or uni – confirm this as a way of starting and then to move on to next relevant section e.g. establishing how many children in household / age (survey responses give some of this info).*

## (1) REASONS FOR UPTAKE / NON-UPTAKE OF TESTING, INCLUDING SETTING SPECIFIC REASONS

***If refused testing / no intention to test:***

Relevant survey responses \_\_\_\_\_

You indicated in the survey that .....

Can you describe in a bit more detail the reasons why you / your household have decided against taking a lateral flow test?

Probe around decision-making processes based on response e.g. any family member/colleague/friend encouragement/discouragement/research undertaken/any media influence/ knowledge of government guidance etc.

If household (school testing) probe around who made the decision e.g. joint decision between parents / family?

**Additional prompts;**

Is there anything that might make you consider lateral flow testing in the future?

***If testing / intending to test-***

Relevant survey responses \_\_\_\_\_

You indicated in the survey that .....

Can you describe in a bit more detail the reasons why you / your household have decided to take a lateral flow test/s?

Probe around decision-making process i.e. any family member/colleague/friend encouragement/discouragement/research undertaken/any media influence.

If household (school testing) probe around who made the decision e.g. joint decision between parents / family?

**Additional prompts;**

Is there anything that might make you reconsider lateral flow testing in the future e.g. stop you wanting to test?

(2) PATTERNS OF TESTING BEHAVIOUR AND UNDERPINNING RATIONALE – WHO WITHIN HOUSEHOLDS (SCHOOLS PARTICULARLY), FREQUENCY OF TESTING, TEST REPORTING

**Frequency of testing**

Survey responses \_\_\_\_\_

You indicated in the survey that .....

Can you describe in a bit more detail the reasons why you / your household have decided to take a lateral flow test/s this often?

Probe around decision-making process e.g. following government guidance, any family member/colleague/friend encouragement/discouragement/research undertaken/any media influence.

If household (school testing) probe around who made the decision e.g. joint decision between parents / family?

If testing is twice-weekly as advised – note this and explore why

If testing is not twice-weekly as advised – indicate that guidance is to test twice-weekly and explore reasons for different frequency of testing

If household / school testing and different frequency of testing explore why

**Who within households**

Survey responses \_\_\_\_\_

As above

**Test reporting**

Survey responses \_\_\_\_\_

As above

(3) EXPERIENCE OF TESTING - LACK OF CLARITY / DIFFICULTY

Survey responses \_\_\_\_\_

You indicated in the survey that .....

Can you tell me a bit more about this / describe in a bit more detail

What was unclear?

Is there anything that would have helped / made things better?

Would this deter / prevent you from testing in the future?

Is there anything that could be improved?

(4) POST-TEST BEHAVIOURAL INTENTIONS – TEST RESULT SPECIFIC

-ve result survey responses \_\_\_\_\_

Probe re above

+ve result survey responses \_\_\_\_\_

Probe re above

**Additional prompts**

Have or has a negative or series of negative results influenced your adherence to current or past guidelines, for example, around social distancing or gatherings?

How would a positive lateral flow test impact your life? Probe around daily activities, work implications, mental health, any support needs whilst isolating, childcare whilst isolating.

*(5) TEST PERCEPTIONS – MEANING OF –VE AND +VE TEST RESULTS, PERCEPTIONS OF TEST ACCURACY*

**Meaning of –ve and +ve test results**

Negative – survey response \_\_\_\_\_

Probe about why they feel a negative test indicates this e.g. definitely don't have COVID

Positive – survey response \_\_\_\_\_

Probe about why they feel a positive test indicates this e.g. definitely have COVID

**Perceptions of test accuracy**

Survey responses \_\_\_\_\_

Probe about response

*(6) OVERARCHING VIEWS OF POPULATION TESTING STRATEGIES WITH LFTs*

- 1) How useful do you feel lateral flow testing is as a tool to reduce COVID-19 infections?- Probe around R-rate reduction, accuracy perceptions.
- 2) How do you think a lateral flow test differs from symptomatic testing/PCR testing? – Probe around swiftness of results, process, accuracy, how comfortable they feel self-testing.
- 3) How would you feel about having to ‘do’ a lateral flow test to participate in things or go somewhere? probe around -sporting venues, international travel, music festivals?

*Summary questions*

- 4) In summary, what do you feel the strengths of lateral flow testing are?
- 5) Weaknesses?
- 6) Are there any ways you think improvements to lateral flow testing strategies and information resources could be made?

*Closing comments*

- Ask if any further questions or comments from participant and address these
- Offer to provide summary of findings when available via e-mail
- Thank participant for time and ideas
- Switch off recorder and end interview
